# Supplementary material
Source: MDPI journal article supplement (https://www.mdpi.com/2071-1050/12/11/4561)
Supplement: s1 [file s1]

**Table 1.** Characteristics of the ReSOLVE (Regenerate, Share, Optimize, Loop, Virtualize, Exchange) model.

| No. | Action     | Description                                                                                                                                                                                                                                        | Examples                                                                                                                                                                                                                                                                                                             |
|-----|------------|----------------------------------------------------------------------------------------------------------------------------------------------------------------------------------------------------------------------------------------------------|----------------------------------------------------------------------------------------------------------------------------------------------------------------------------------------------------------------------------------------------------------------------------------------------------------------------|
| 1   | Regenerate | Shifting to renewable energy and materials; reclaiming, retaining, and regenerating health of ecosystems; returning recovered biological resources to the biosphere                                                                                | <ul style="list-style-type: none"> <li>• Shift to renewable energy and materials</li> <li>• Reclaim, retain, and restore health of ecosystems</li> <li>• Return recovered biological resources to the biosphere</li> </ul>                                                                                           |
| 2   | Share      | Keeping the product loop speed low and maximization of the utilization of products by sharing them among users, reusing them throughout their technical lifetime, and prolonging their life through maintenance, repair, and design for durability | <ul style="list-style-type: none"> <li>• Share assets (e.g., cars, rooms, appliances) <ul style="list-style-type: none"> <li>• Reuse/secondhand</li> <li>• Prolong life through maintenance, design for durability, upgradability, etc.</li> </ul> </li> <li>• Increase performance/efficiency of product</li> </ul> |
| 3   | Optimize   | Increasing the performance/efficiency of a product and removal of the waste in production and the supply chain                                                                                                                                     | <ul style="list-style-type: none"> <li>• Remove waste in production and supply chain</li> <li>• Leverage big data, automation, remote sensing, and steering</li> </ul>                                                                                                                                               |
| 4   | Loop       | Keeping components and materials in closed loops, and prioritization of inner loops. In the case of finite materials, this means remanufacturing products or components, and, as a last resort, recycling materials                                | <ul style="list-style-type: none"> <li>• Remanufacture products or components <ul style="list-style-type: none"> <li>• Recycle materials</li> <li>• Digest anaerobically</li> </ul> </li> <li>• Extract biochemicals from organic waste</li> </ul>                                                                   |
| 5   | Virtualize | Delivering and using the utility virtually                                                                                                                                                                                                         | <ul style="list-style-type: none"> <li>• Books, music, travel, online shopping, autonomous vehicles, etc.</li> <li>• Replace old with advanced non-renewable materials</li> </ul>                                                                                                                                    |
| 6   | Exchange   | Replacing the old materials with advanced non-renewable materials and applying of the new technologies                                                                                                                                             | <ul style="list-style-type: none"> <li>• Apply new technologies (e.g., 3D printing)</li> <li>• Choose new products/services (e.g., multimodal transport)</li> </ul>                                                                                                                                                  |

Source: Growth Within: A Circular Economy Vision for a Competitive Europe, Ellen MacArthur Foundation, SUM, McKinsey Center for Business and Environment; [www.ellenmacarthurfoundation.org/assets/downloads/publications/EllenMacArthurFoundation\\_Growth-Within\\_July15.pdf](http://www.ellenmacarthurfoundation.org/assets/downloads/publications/EllenMacArthurFoundation_Growth-Within_July15.pdf), 2015.
